# Supplementary material
Source: publisher site journal article supplement (https://www.dovepress.com/article/401647)
Supplement: Supplementary file 1 [file get_supplementary_file.php]

**Supplementary Material**

**Table S1.** Association of 18F-FDG PET/CT parameters with PFS

| PET/CT parameters | PFS (month) | HR | 95% CI | p value |
| --- | --- | --- | --- | --- |
| SUVmax |  |  |  | 0.16 |
| H | (4.63, 2.87-10.67) | / | / |  |
| L | (6.22, 2.15-11.29) | 1.199 | 0.929-1.548 |  |
| MTV |  |  |  | 0.12 |
| H | (3.73, 2.50-10.00) | / | / |  |
| L | (6.57, 2.72-12.73) | 1.225 | 0.949-1.582 |  |
| TLG |  |  |  | 0.22 |
| H | (3.93, 2.50-10.67) | / | / |  |
| L | (6.55, 2.72-11.07) | 1.170 | 0.907-1.509 |  |

PFS data was expressed as the median and IQR.

Abbreviations: SUVmax: maximum Standardized Uptake Value, MTV: Metabolic Tumor Volume, TLG: Total Lesion Glycolysis, PFS: Progression-Free Survival

**Table S2.** Correlation between MTV and clinical characteristics

| Variable | Category | High MTV group  (n=39) | Low MTV group  (n=38) | p value  (X2 test) |
| --- | --- | --- | --- | --- |
| Sex | Female | 4 (10.3) | 8 (21.1) | 0.192 |
|  | Male | 35 (89.7) | 30 (78.9) |  |
| Age | <65 | 28 (71.8) | 7 (18.4) | <0.001 |
|  | 65 | 11 (28.2) | 31 (81.6) |  |
| AFP | <400 | 19 (48.7) | 24 (63.2) | 0.253 |
| (ng/mL) | 400 | 20 (51.3) | 14 (36.8) |  |
| ECOG-PS | 0 | 22 (56.4) | 27 (71.1) | 0.182 |
|  | 1 | 17 (43.6) | 11 (28.9) |  |
| BCLC stage | B | 4 (10.3) | 4 (10.5) | 0.969 |
|  | C | 35 (89.7) | 34 (89.5) |  |
| Child-Pugh | A | 36 (92.3) | 36 (94.7) | 0.665 |
|  | B-C | 3 (7.7) | 2 (5.3) |  |
| Macrovascular invasion | Yes | 15 (38.5) | 17 (44.7) | 0.576 |
|  | No | 24 (61.5) | 21 (55.3) |  |
| Bone metastasis | Yes | 7 (17.9) | 7 (18.4) | 0.957 |
|  | No | 32 (82.1) | 31 (81.6) |  |

N (%) P value <0.05 are shown in bold*

Abbreviations: TLG: Total Lesion Glycolysis, AFP: alpha-fetoprotein; ECOG-PS: Eastern Cooperative Oncology Group Performance Status; BCLC stage: Barcelona Clinic Liver Cancer stage

**Table S3.** Univariate and multivariate analysis of prognostic factors associated with PFS in patients with HCC

| Variables | Univariate analysis | | |  | Multivariate analysis | | |
| --- | --- | --- | --- | --- | --- | --- | --- |
| HR | 95%CI | P value | HR | 95%CI | p value |
| Age |  |  |  |  |  |  |  |
| 65 years | 0.797 | 0.580-1.095 | 0.161 |  |  |  |  |
| 65years | 1 (reference) |  |  |  |  |  |  |
| Gender |  |  |  |  |  |  |  |
| Male | 1.095 | 0.797-1.504 | 0.576 |  |  |  |  |
| Female | 1 (reference) |  |  |  |  |  |  |
| Prior local treatment |  |  |  |  |  |  |  |
| Presence | 0.725 | 0.418-1.257 | 0.252 |  |  |  |  |
| Absence | 1 (reference) |  |  |  |  |  |  |
| Previous line treatment |  |  |  |  |  |  |  |
| 2 | 0.965 | 0.679-1.373 | 0.844 |  |  |  |  |
| 1 | 1 (reference) |  |  |  |  |  |  |
| Current treatment |  |  |  |  |  |  |  |
| PD-1 based | 1.589 | 0.678-3.724 | 0.286 |  |  |  |  |
| PD-L1 based | 1 (reference) |  |  |  |  |  |  |
| AFP, ng/mL |  |  |  |  |  |  |  |
| 400 | 0.899 | 0.695-1.163 | 0.417 |  |  |  |  |
| 400 | 1 (reference) |  |  |  |  |  |  |
| ECOG-PS |  |  |  |  |  |  |  |
| 1 | 1.656 | 1.145-2.395 | 0.007 |  | 1.558 | 1.066-2.276 | 0.022 |
| 0 | 1 (reference) |  |  |  |  |  |  |
| Child-pugh |  |  |  |  |  |  |  |
| B-C | 2.525 | 1.527-4.184 | <0.001 |  | 2.315 | 1.377-3.891 | 0.002 |
| A | 1 (reference) |  |  |  |  |  |  |
| BCLC stage |  |  |  |  |  |  |  |
| B | 0.851 | 0.558-1.299 | 0.455 |  |  |  |  |
| C | 1 (reference) |  |  |  |  |  |  |
| Vascular Invasion |  |  |  |  |  |  |  |
| Presence | 0.928 | 0.554-1.552 | 0.775 |  |  |  |  |
| Absence | 1 (reference) |  |  |  |  |  |  |
| Extra hepatic spread |  |  |  |  |  |  |  |
| Presence | 0.827 | 0.454-1.505 | 0.534 |  |  |  |  |
| Absence | 1 (reference) |  |  |  |  |  |  |
| Bone metastasis |  |  |  |  |  |  |  |
| Presence | 1.848 | 0.968-3.534 | 0.062 |  |  |  |  |
| Absence | 1 (reference) |  |  |  |  |  |  |
| Numbers of Involved organs |  |  |  |  |  |  |  |
| ≥3 | 0.826 | 0.375-1.817 | 0.634 |  |  |  |  |
| <3 | 1 (reference) |  |  |  |  |  |  |
| Cirrhosis |  |  |  |  |  |  |  |
| Presence | 0.956 | 0.734-1.246 | 0.739 |  |  |  |  |
| Absence | 1 (reference) |  |  |  |  |  |  |
| SUVmax |  |  |  |  |  |  |  |
| 7.12 | 1.199 | 0.929-1.548 | 0.163 |  |  |  |  |
| 7.12 | 1 (reference) |  |  |  |  |  |  |
| MTV, cm3 |  |  |  |  |  |  |  |
| 39.65 | 1.225 | 0.949-1.582 | 0.119 |  |  |  |  |
| 39.65 | 1 (reference) |  |  |  |  |  |  |
| TLG, g |  |  |  |  |  |  |  |
| 159.2 | 1.170 | 0.907-1.509 | 0.227 |  |  |  |  |
| 159.2 | 1 (reference) |  |  |  |  |  |  |


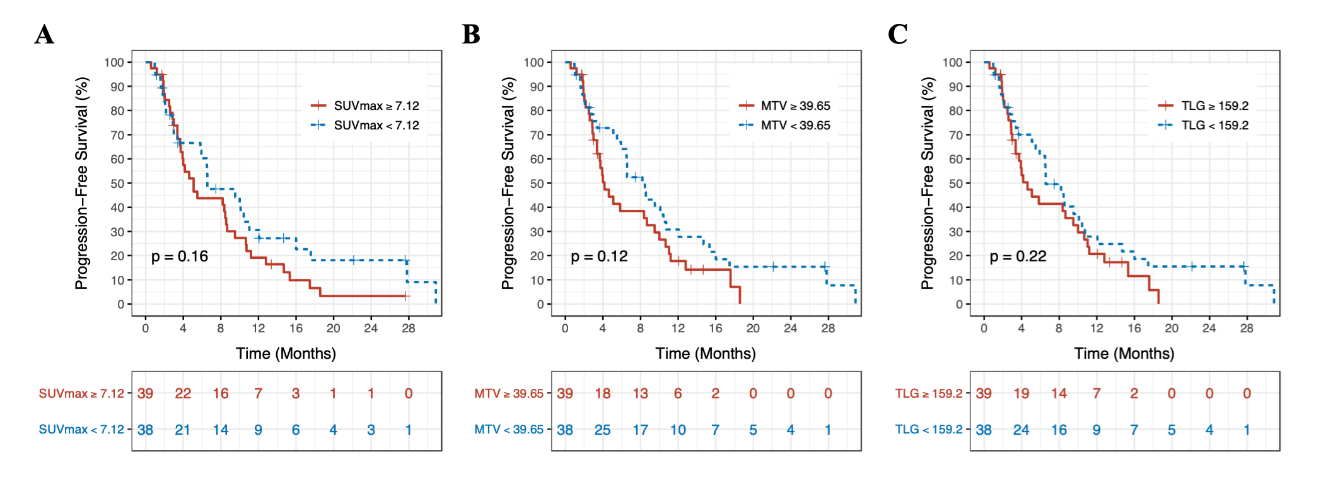


**Figure S1:** Kaplan–Meier curves for PFS in relation to (A) SUVmax, (B) MTV, and (C) TLG (p values for log-rank test); Table S1: Association of 18F-FDG PET/CT parameters with PFS. Table S2: Correlation between MTV and clinical characteristics; Table S3: Univariate and multivariate analysis of prognostic factors associated with PFS in patients with HCC.
